# Supplementary material
Source: PubMed Central journal article supplement (PMC2703530)
Supplement: en.2008-1447_1.pdf [file en.2008-1447_1.pdf]

**Table 1: Progesterone up-regulates genes that promote cell cycle and down-regulates those inhibit the cell cycle**

| Genes in categories    | Multivariate statistic (P <sub>4</sub> vs control) | Univariate analysis (P <sub>4</sub> vs control) | Gene Function                                                                                 | Direction of changes (P <sub>4</sub> vs control) |
|------------------------|----------------------------------------------------|-------------------------------------------------|-----------------------------------------------------------------------------------------------|--------------------------------------------------|
| Cyclins                | P<0.001                                            | CyclinA, p< 0.05                                | Regulatory subunit of Cdk2 and facilitates cell cycle progression.                            | Increased                                        |
|                        |                                                    | CyclinB1, p<0.05                                | Members of the M phase promoting factor complex.                                              |                                                  |
|                        |                                                    | CyclinG1, p<0.05<br>CyclinG2, p<0.05            | G2/M phase promoting factor, expression peaks at late S phase.                                |                                                  |
| CDKs                   | P<0.001                                            | Cdc2a, p<0.05                                   | Members of the M phase promoting factor complex                                               | Increased                                        |
|                        |                                                    | Cdk2, p<0.05                                    | S phase promoting factor                                                                      |                                                  |
|                        |                                                    | Cdk4, p<0.05                                    | G1 phase promoting factor.                                                                    |                                                  |
| CDK inhibitors         | P<0.001                                            | Cdkn2b (p15), p<0.01                            | G1/S phase inhibitor                                                                          | Decreased                                        |
|                        |                                                    | Cdkn3, p<0.05                                   | G1/S phase inhibitor                                                                          |                                                  |
| Cell cycle checkpoint  | P<0.001                                            | Mad2l2, p<0.05                                  | S/M phase inhibitor                                                                           | Decreased                                        |
|                        |                                                    | Nanos2, p<0.05                                  | G1/S phase inhibitor                                                                          |                                                  |
|                        |                                                    | Nfatc, p<0.05                                   | G1/S phase inhibitor                                                                          |                                                  |
|                        |                                                    | Wee1, p<0.01                                    | S/M phase inhibitor                                                                           |                                                  |
| DNA replication factor | P<0.001                                            | Mcm5, p<0.05<br>Mcm7, p<0.05                    | Minichromosome maintenance complex components, involved in the initiation of DNA replication. | Increased                                        |
|                        |                                                    | Pcna, p<0.01                                    | proliferating cell nuclear antigen                                                            |                                                  |
| Housekeeping Gene      |                                                    | Aldoa, p=0.245<br>Gapdh, p=0.098                |                                                                                               | No change                                        |

Cultures of rNPCs were treated with vehicle or 100pM P4 for 6 hr, followed by extraction of total RNA. Nonradioactive probes were prepared and hybridized to gene array. Data were determined by optical density and subjected to multivariate ANOVA.
