# Supplementary material
Source: PubMed Central journal article supplement (PMC2703530)
Supplement: en.2008-1447_2.pdf [file en.2008-1447_2.pdf]

**Table 2: Summary of the structure-activity-relationship (SAR) analysis of progestins to cPR.**

| Progestins                                                                      | Structure                                                                           | PR binding GoldScore | Experimental Value | BrdU Incorporation |
|---------------------------------------------------------------------------------|-------------------------------------------------------------------------------------|----------------------|--------------------|--------------------|
| 5 $\alpha$ -Dihydroprogesterone (5 $\alpha$ -Pregnane-3, 20-dione)              | 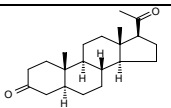   | 65.31                | 96.8127 nM         | --                 |
| Epiallopregnanolone (3 $\alpha$ -hydroxy-5 $\beta$ -pregnan-20-one)             |    | 63.86                | 594.922 nM         | +                  |
| 5 $\alpha$ -Pregnan-3 $\beta$ -ol                                               |    | 62.93                | No binding         | --                 |
| Allopregnanediol (5 $\alpha$ -pregn-an-3 $\alpha$ , 20 $\alpha$ -diol)          |    | 62.69                | No Binding         | --                 |
| Allopregnanolone (3 $\alpha$ -hydroxy-5 $\alpha$ -pregnan-20-one, AP $\alpha$ ) |    | 62.08                | No Binding         | +++                |
| Progesterone (pregn-4-ene-3, 20-dione)                                          |   | 61.11                | 9.00593 nM         | +++                |
| Epipregnanolone (3 $\beta$ -hydroxy-5 $\beta$ -pregnan-20-one, AP $\beta$ )     |  | 60.56                | 28.359 nM          | --                 |
| 3 $\beta$ -hydroxy-5 $\alpha$ -pregnan-20-one                                   |  | 58.77                | No Binding         | --                 |
| Allopregnanetriol (5 $\alpha$ -pregnan-3 $\alpha$ , 17, 20 $\alpha$ -triol)     |  | 57.86                | No Binding         | +                  |
| Ganaxolone (3 $\alpha$ -hydroxy-5 $\beta$ -methyl-5 $\alpha$ -pregnan-20-one)   |  | 50.35                | No Binding         | ++                 |
| Pregnanolone Sulfate (5-pregnan-3 $\beta$ -ol-20-one-3-sulfate)                 |  | 29.28                | No Binding         | --                 |

All steroids tested for proliferative effects in rNPCs were listed with their chemical structure (2<sup>nd</sup> column) and predicted cPR binding value from computational modeling (3<sup>rd</sup> column). GoldScore, which has been optimized for the prediction of ligand binding positions, was listed in the 3<sup>rd</sup> column. A higher GoldScore indicates a higher binding affinity to cPR based on the modeling. The PR binding affinity and selectivity of the steroids were confirmed determined by a cPR fluorescent polarization competitive binding assay and polarization values were plotted against the logarithm of the test compound concentration. IC<sub>50</sub> value, the concentration of the test compound that displaces half of the PL Red from PR, was determined (4<sup>th</sup> column). PR and PL Red (equivalent to 0% inhibition) was used as negative control and free PL Red (equivalent to 100% inhibition) was used as positive control. Proliferative effects from BrdU chemiluminescence ELISA were summarized in the last column. +: pro-proliferative effect. -: no effect on proliferation.
